# Supplementary material for: Syntheses, crystal structures, MMCT and magnetic properties of four one-dimensional cyanide-bridged complexes comprised of MII–CN–FeIII(M = Fe, Ru, Os)
Source: Royal Society of Chemistry journal article supplement (doi:10.1039/c4dt02272f), 2014-01-01
Supplement: c4dt02272f1.pdf [file c4dt02272f1.pdf]

## Supporting Information

Syntheses, crystal structures, MMCT and magnetic properties of four one-dimensional cyanide-bridged complexes comprised of  $M^{II}$ -CN- $Fe^{III}$  ( $M = Fe, Ru, Os$ )

Yong Wang,<sup>a,b</sup> Xiao Ma,<sup>a</sup> Shengmin Hu,<sup>a</sup> Zhenzhen Xue,<sup>a,b</sup> Yuehong Wen,<sup>a</sup> Xiaoquan Zhu,<sup>a,b</sup> Xudong Zhang,<sup>a</sup> Tianlu Sheng<sup>\*,a</sup> and Xintao Wu<sup>a</sup>

<sup>a</sup> State Key Laboratory of Structure Chemistry, Fujian Institute of Research on the Structure of Matter, Chinese Academy of Sciences, Fuzhou, 350002, P. R. China

<sup>b</sup> School of Chemistry and Chemical Engineering, University of Chinese Academy of Sciences, Beijing, 100049, P. R. China

E-mail address: [tsheng@fjirsm.ac.cn](mailto:tsheng@fjirsm.ac.cn). Tel.: +086 (0)591 83792294.

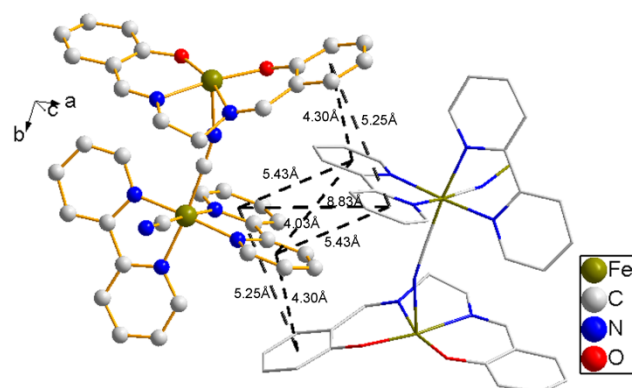

**Figure S1** Packing structure of complex **3**.

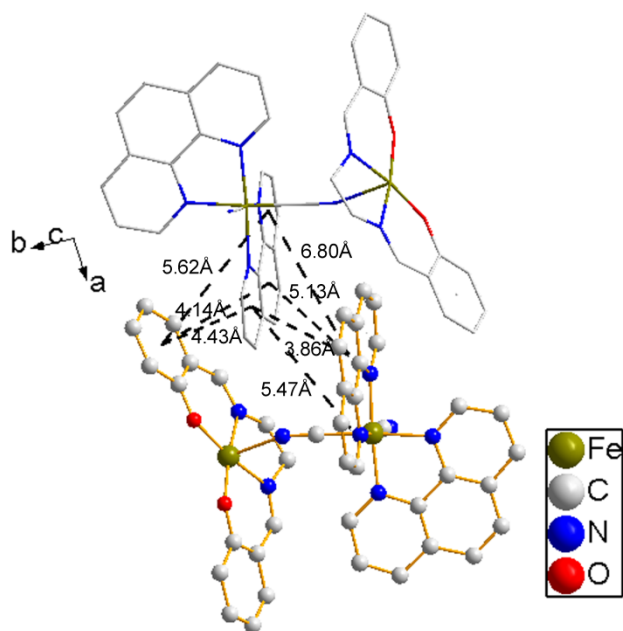

**Figure S2** Packing structure of complex 4.

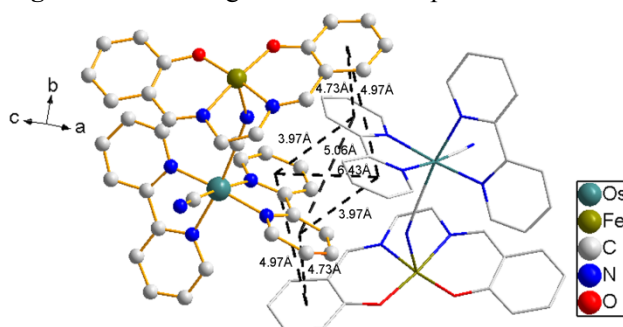

**Figure S3** Packing structure of complex 6.

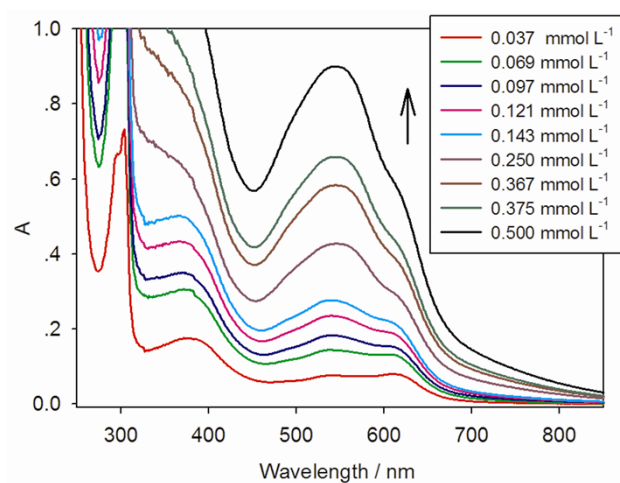

**Figure S4** Spectral variation of complex 3 at different concentration in acetonitrile solution (from bottom to top:  $3.7 \times 10^{-5}$ ,  $6.9 \times 10^{-5}$ ,  $9.7 \times 10^{-5}$ ,  $1.21 \times 10^{-4}$ ,  $1.43 \times 10^{-4}$ ,  $2.50 \times 10^{-4}$ ,  $3.67 \times 10^{-4}$ ,  $3.75 \times 10^{-4}$  and  $5.0 \times 10^{-4}$  mol L<sup>-1</sup>).

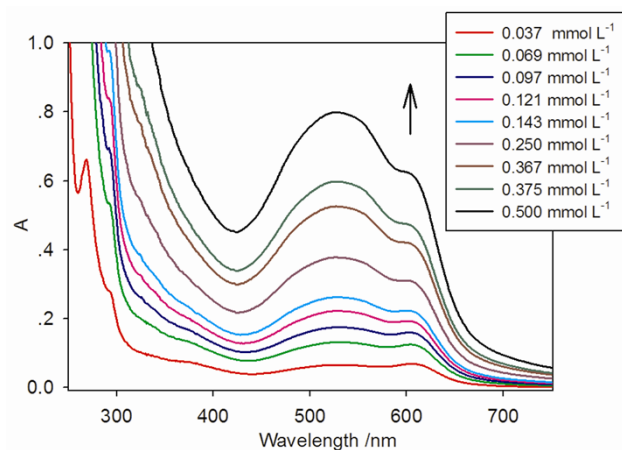

**Figure S5** Spectral variation of complex **4** at different concentration in acetonitrile solution (from bottom to top:  $3.7 \times 10^{-5}$ ,  $6.9 \times 10^{-5}$ ,  $9.7 \times 10^{-5}$ ,  $1.21 \times 10^{-4}$ ,  $1.43 \times 10^{-4}$ ,  $2.50 \times 10^{-4}$ ,  $3.67 \times 10^{-4}$ ,  $3.75 \times 10^{-4}$  and  $5.0 \times 10^{-4}$  mol L<sup>-1</sup>).

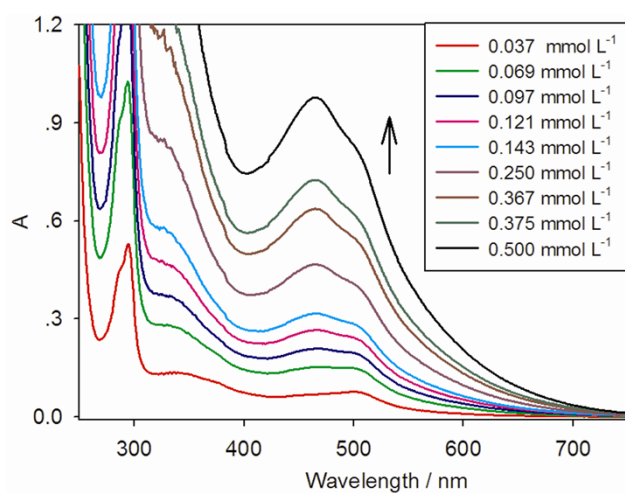

**Figure S6** Spectral variation of complex **5** at different concentration in acetonitrile solution (from bottom to top:  $3.7 \times 10^{-5}$ ,  $6.9 \times 10^{-5}$ ,  $9.7 \times 10^{-5}$ ,  $1.21 \times 10^{-4}$ ,  $1.43 \times 10^{-4}$ ,  $2.50 \times 10^{-4}$ ,  $3.67 \times 10^{-4}$ ,  $3.75 \times 10^{-4}$  and  $5.0 \times 10^{-4}$  mol L<sup>-1</sup>).

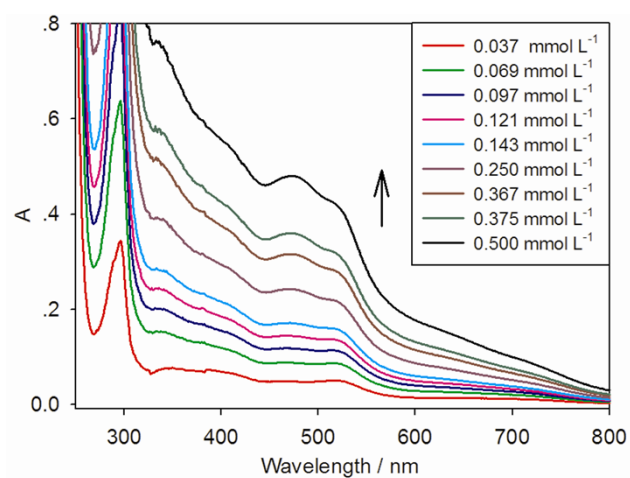

**Figure S7** Spectral variation of complex **6** at different concentration in acetonitrile solution (from

bottom to top:  $3.7 \times 10^{-5}$ ,  $6.9 \times 10^{-5}$ ,  $9.7 \times 10^{-5}$ ,  $1.21 \times 10^{-4}$ ,  $1.43 \times 10^{-4}$ ,  $2.50 \times 10^{-4}$ ,  $3.67 \times 10^{-4}$ ,  $3.75 \times 10^{-4}$  and  $5.0 \times 10^{-4} \text{ mol L}^{-1}$ ).
